1 Title: NeuroGPU, software for NEURON modeling in GPU-based hardware

2

3 Authors: Roy Ben-Shalom<sup>1,2</sup>, Nikhil S. Artherya<sup>3</sup>, Christopher Cross<sup>1?</sup>, Hersh Sanghevi<sup>3</sup>, Alon  
4 Korngreen<sup>4,5</sup>, Kevin J. Bender<sup>1,2</sup>.

5

6 Affiliations:

7 1. Weill Institute for Neurosciences, University of California, San Francisco, San Francisco  
8 CA, USA

9 2. Department of Neurology, University of California, San Francisco, San Francisco, CA,  
10 USA

11 3. Department of Electrical Engineering and Computer Science, University of California,  
12 Berkeley, Berkeley CA, USA

13 4. The Leslie and Susan Gonda Multidisciplinary Brain Research Center, Bar-Ilan  
14 University, Ramat-Gan Israel

15 5. The Mina and Everard Goodman Faculty of Life Sciences, Bar-Ilan University, Ramat-  
16 Gan Israel

17 Lead contact: roy.benshalom@ucsf.edu

18 **Abstract:**

19 Generating biologically detailed models of neurons is an important goal for modern  
20 neuroscience. Unfortunately, constraining parameters within biologically detailed models can  
21 be difficult, leading to poor model predictions, especially if such models are extended beyond  
22 the specific problems for which they were designed. This major obstacle can be partially  
23 overcome by numerical optimization and detailed exploration of parameter space. These  
24 processes, which currently rely on central processing unit (CPU) computation, are  
25 computationally demanding, often with exponential increases in computing time and cost for  
26 marginal improvements in model behavior. As a result, models are often compromised in scale  
27 given available CPU-based resources. Here, we present a simulation environment, NeuroGPU,  
28 that takes advantage of the inherent parallelized structure of graphics processing unit (GPU) to  
29 accelerate neuronal simulation. NeuroGPU can simulate most of biologically detailed models  
30 from commonly used databases 1-2 orders of magnitude faster than traditional single core CPU  
31 processors, even when implemented on relatively inexpensive GPU systems. Thus, NeuroGPU  
32 offers the ability to apply compartmental, biologically detailed, modeling approaches with  
33 supercomputer-level speed at substantially reduced cost.

34

35

36 **Introduction:**

37 Detailed numerical models, faithfully capturing neuronal complexity, are invaluable for  
38 simulating the behavior of realistic neural networks (Einevoll et al., 2019). Generating models  
39 that accurately recapitulate neuronal activity often requires one to tune individual model  
40 parameters. This process can be aided by iterative rounds of parameter exploration and  
41 optimization that aim to minimize the differences between empirical data targets and their  
42 associated models. These processes can be computationally demanding. Indeed, each linear  
43 improvement in model accuracy requires an exponential increase in computational resources  
44 (Nocedal and Wright, 2006; Gurkiewicz and Korngreen, 2007) Thus, model optimization is often  
45 done on supercomputers that parallelize these computations across central processing unit  
46 (CPU) clusters. Unfortunately, due to the cost of constructing and running such supercomputing  
47 clusters, such efforts are typically restricted to large consortia, such as the Blue Brain Project  
48 (BBP) (Markram et al., 2015) and the Allen Institute (Gouwens et al., 2018). For more restricted  
49 budgets, simulations must typically be compromised in scale or complexity to produce results  
50 within budget and within a reasonable time frame.

51 In the past 10 years, graphical processing units (GPUs) have emerged as an alternative to  
52 CPU-based clusters that may offer comparable levels of performance at substantially reduced  
53 cost. GPUs utilize streaming multiprocessors with multiple simple cores that allow for  
54 distributed, parallelized computing. With software optimized for distributed computing, GPU-  
55 based applications can often outperform CPU-based applications in processing speed and cost  
56 (Payne et al., 2010). Today, GPUs are widely used in scientific fields like molecular dynamics  
57 (Go et al., 2012; Salomon-Ferrer et al., 2013) and climate modeling (Prein et al., 2015), and are  
58 the computational engine for most modern artificial intelligence applications (Schmidhuber,  
59 2015). In neuroscience, GPUs are currently being used to accelerate complex imaging dataset  
60 processing (Eklund et al., 2013), spiking neural network analysis (Fidjeland and Shanahan,  
61 2010), and clustering of activity from *in vivo* extracellular electrophysiological experiments  
62 (Pachitariu et al., 2016). Despite these advances until recently that two frameworks for  
63 simulating biophysical neuronal networks (Akar et al., 2019; Kumbhar et al., 2019) were  
64 published, relatively little effort has been made to leverage GPU-based architecture for  
65 biophysically detailed neuronal simulation.

66 Here, we describe NeuroGPU, a computational platform optimized to exploit GPU architecture  
67 to dramatically accelerate simulation of neuronal compartmental models. To do so, we

68 developed new approaches to parallelize compartmental models, utilizing the GPU-based  
69 programming language CUDA to optimize memory handling on GPUs. This resulted in  
70 simulation speedups of up to 200-fold on a single GPU and up to 800-fold using a set of 4  
71 GPUs. Building on our previous efforts (Ben-Shalom et al., 2013), we developed an intuitive  
72 user interface that can import most compartmental models in ModelDB or the BBP portal.  
73 Further, we provide methods to explore model parameter space and to optimize models with  
74 evolutionary algorithms (DEAP). NeuroGPU therefore provides an open-source platform useful  
75 for neuronal simulation with increased speed and reduced cost.

76

## 77 **Results:**

### 78 **General overview**

79 Our primary goal for NeuroGPU was to improve compartmental modeling speed with relatively  
80 low-cost hardware and provide an interface to port NEURON models from public databases  
81 such as ModelDB and the BBP portal. Toward that end, we utilized the same basic structure as  
82 NEURON, including the use of hoc and mod files that define all aspects of the compartmental  
83 model. To increase simulation speed, we focused primarily on parallelizing the most  
84 computationally intensive aspect of NEURON simulations in GPU architecture. NEURON  
85 calculates the voltages of each segment of the model by solving a system of differential  
86 equations that describes current flow in each compartment. Within NEURON, this differential  
87 equation system is represented within a tri-diagonal matrix (Hines, 1984). Typically, matrix  
88 elements for neighboring compartments are solved in serial, as current flow in one compartment  
89 is interdependent on flow in neighboring compartments. We and others have previously  
90 developed methods to solve this tri-diagonal matrix in parallel across GPUs, despite the  
91 interdependence of current flow across compartments (Hines et al., 2008, n.d.; Ben-Shalom et  
92 al., 2013). At that time, the method was implemented only for Hodgkin-Huxley models (Ben-  
93 Shalom et al., 2013). Here, we extended this method to support a wider range of models,  
94 including most models available in ModelDB and the Blue Brain Project (BBP) repository. This is  
95 implemented in Python, with an iPython Graphical User Interface (GUI).

### 96 **Porting NEURON simulations to NeuroGPU**

97 NeuroGPU simulations begin by importing NEURON's mod and hoc files via a GUI developed in  
98 iPython notebook (Figure 1). The user must input a file containing model stimulation, which  
99 includes temporal aspects of the model and command currents delivered at a prescribed  
100 location. Furthermore, all free parameters, such as channel properties, must be described (Fig.  
101 1B). These import components are translated into CUDA code, termed kernels, that can run on  
102 the GPU via the python script "extractmodel.py" (Fig. 1C). This script first takes runModel.hoc  
103 and loads it into NEURON, not to run simulations, but rather to query NEURON for model  
104 properties needed for subsequent porting to NeuroGPU, including compartment names and the  
105 tri-diagonal matrix (F-Matrix). Then, the script iterates over the .mod files in the directory, parses  
106 them and creates relevant kernels for each mechanism described. Mechanism kernels are  
107 written to the AllModels.cu in similar structure as described previously (Hines and Carnevale,

108 2000; Carnevale and Hines, 2006), iterating over all compartments defined in the model. A new  
109 hoc file is created to register mechanism values, which are stored in AllParams.csv and inserted  
110 in each compartment. Finally, the script writes code translated to CUDA in NeuroGPU.cu and  
111 packages the application to run on either Windows or Unix. After compiling the code, an  
112 executable is created that reads the AllParams.csv and the stimulation and runs the model on  
113 the GPU.

## 114 **NeuroGPU implementation**

115 We used CUDA to implement NEURON-based modeling using GPUs. CUDA is an extension of  
116 the C programming language that enables computation on the GPU (Nvidia, 2018). CUDA  
117 kernels which are procedures running on the GPU can be invoked from either the GPU or CPU.  
118 To invoke a kernel from the CPU, one must specify the number of parallel threads used.  
119 Threads, which allow for parallelization on the GPU, are organized into blocks, with each thread  
120 occupying a specific address within that block (idx.x, idx.y). GPUs are structured to operate well  
121 when computing 32 parallel threads, a computing structure termed a warp (Nvidia, 2018).  
122 Therefore, we structured NeuroGPU to utilize 32 threads in the x dimension, corresponding to  
123 individual morphological segments within the model. For a given model with more than 32  
124 segments, individual threads are responsible for calculating every 32<sup>nd</sup> segment. For example,  
125 thread #1 would calculate segments 1, 33, 65, ... 31N+1.

126 Complex neuronal models, including many described in the BBP (Hay et al., 2013; Ramaswamy  
127 et al., 2015), are memory intensive. GPUs have several forms of memory that have tradeoffs in  
128 terms of their size and relative speed that make them ideal for certain aspects of model  
129 processing and impractical for others. GLOBAL memory is the largest physical memory space  
130 available on the GPU but is relatively slow. Here, we use GLOBAL memory to store the largest  
131 data structures associated with a given model, in part because they simply cannot be held by  
132 other memory structures. SHARED memory is far faster, shared among the whole GPU block,  
133 but limited to 48 kilobytes. This makes it ideal for storing the tridiagonal matrix, as this matrix is  
134 the most accessed data structure within NeuroGPU. CONSTANT memory, which is a 64  
135 kilobyte block of fast, read-only memory, is used to hold constant data structures, including the  
136 order in which the tri-diagonal matrix is solved in parallel (Ben-Shalom et al., 2013). Lastly,  
137 REGISTER\LOCAL memory is the fastest memory available on the GPU but is limited to  
138 maximum of 63 registers per thread and a total of 16 kilobytes of memory shared across the  
139 entire block. It is used to store local variables necessary for the course of the simulation.

140 To determine how best to utilize GPU parallel processing, we examined two ways in which to  
141 simulate compartmental models on the GPU. In both cases, the GPU is responsible for updating  
142 ionic currents from established mechanisms, solving the tridiagonal matrix, and updating model  
143 states and voltages at each time step. In the first configuration, termed SingleKernel, we  
144 computed all the time steps of each simulation in one kernel on the GPU, largely because this  
145 would limit the amount of time performing the relatively slow step of transferring memory  
146 between the GPU and CPU. In this case, the transfer is done only once and during the  
147 simulation the GPU communicates with the CPU only to transfer voltages reported at the  
148 recording electrode site. Alternatively, we also created a SplitKernel condition, in which the  
149 simulation is split into many small kernels that are invoked every single time step. Data are then  
150 registered back to the CPU and the next time step is run in serial. This approach may be  
151 advantageous if memory transfer between the GPU and CPU is not the rate-limiting step.  
152 Furthermore, in this case the GPU can also optimize computing timing by queueing certain  
153 steps for execution while other memory is being transferred. Both the SingleKernel and  
154 SplitKernel configuration were assessed in all cases reported below.

## 155 **Benchmarking**

156 To determine how NeuroGPU performs relative to NEURON, we benchmarked it for relative  
157 speed and accuracy across different conditions: CUDA implementation, hardware configurations  
158 and across a range of models. We first compared NeuroGPU performance with a single GPU to  
159 NEURON implemented on a single CPU core.

160 We began with a simple model of a soma and single dendritic branch that has 64 segments in  
161 total (Figure 1A), each containing a single external mechanism pas.mod that describes passive  
162 current flow. This model was stimulated with a simple current step (Fig. 1B). Voltage  
163 discrepancies that never exceeded 0.4  $\mu\text{V}$  were observed between NeuroGPU and NEURON  
164 when simulation voltage changed rapidly. These discrepancies were due to small differences in  
165 timing that likely arise from how numbers are rounded in GPUs vs CPUs (Whitehead, 2011).

166 To benchmark relative speed, we evaluated computing time for multiple instances of the same  
167 model. NEURON computation speed scales linearly with the number of simulations, and, for low  
168 numbers of models (< 8), outperforms NeuroGPU. By contrast, models implemented on GPUs  
169 scale linearly only after saturating all streaming multiprocessors. With NeuroGPU, processing  
170 times are quite similar for any simulation incorporating fewer than 128 models, and begin to

171 outpace NEURON simulations when >32 simulations are run simultaneously. Relative gains in  
172 processing time were noted when 32 to 16,384 models were run simultaneously. These gains  
173 were dependent on hardware. For example, implementing NeuroGPU on an NVIDIA TitanXP  
174 GPU resulted in 25.2-fold improvements in processing speed, while the same models run on an  
175 NVIDIA Tesla V100 were 95.8-fold faster (both implemented in the “SingleKernel”  
176 configuration). It is worth noting that TitanXP hardware is relatively low cost (<\$1099) and very  
177 similar card (NVIDIA GTX-1660) can currently be purchased for less than \$300, suggesting that  
178 significant improvements in processing speed can be obtained even with modestly priced  
179 hardware.

180 More complex neuronal morphology could affect NeuroGPU processing speed. Therefore, we  
181 implemented the same passive mechanism on the more complex structure of a neocortical  
182 pyramidal neuron. While voltage discrepancies were similarly small in this instance ( $< 4 \times 10^{-6}$   
183 mV), the relative speedup was lower than with simpler morphology (TitanXP: 15.2x; Tesla V100:  
184 58.1x). Thus, while morphology does affect relative speed, NeuroGPU still outperforms CPU-  
185 based modeling.

186 In addition to complex morphology, compartmental models typically contain an array of  
187 mechanisms that simulate voltage-gated channels or ligand-gated receptors. To assess  
188 NeuroGPU performance with such models, we began with a pyramidal model neuron first  
189 described by Mainen and Sejnowski (1996). This model has 7 different mechanisms, including  
190 voltage-gated sodium, potassium, and calcium channels, and a calcium-dependent potassium  
191 channel. As with the passive model described above, we implemented these mechanisms in  
192 both simple and complex morphologies (e.g., soma and primary dendrite alone, or complete  
193 pyramidal cell morphology). In models with simple morphology, NeuroGPU was 30.3x (TitanXP)  
194 or 153.1x (Tesla V100) faster than NEURON, with minimal voltage error ( $< 4 \mu\text{V}$ ). In pyramidal  
195 cell morphology models, NeuroGPU was 45.3x (TitanXP) or 114.2x (Tesla V100) faster than  
196 NEURON. In this instance, we observed a relatively large voltage discrepancy of 6.6 mV. This  
197 discrepancy occurred during the last AP within a burst and was due largely to a shift in the  
198 timing of this AP (Fig. 4G). Indeed, we were able to reduce this error  $\sim 6$ x by interpolating the  
199 data and shifting the timing of this AP by  $\frac{1}{4}$  of a timestep.

200 While the Mainen and Sejnowski model can generate physiologically-realistic spiking activity,  
201 these APs occur over a relatively narrow range of stimulus intensities. Outside this range the  
202 model is either subthreshold or enters depolarization block. As a result, we found this model to



203 be impractical for benchmarking NeuroGPU across a range of stimuli. Therefore, we tested  
204 NeuroGPU on more recently developed models from the Blue Brain Project portal. Here, we  
205 used two models: one of a layer 5 pyramidal neuron (BBP\_PC, see Methods for specific model)  
206 and one of a layer 5 chandelier interneuron (BBP\_CC). Models were interrogated with a range  
207 of stimulus intensities to determine relative differences between NeuroGPU and NEURON (Fig.  
208 5). Similar to Mainen and Sejnowski, voltage differences were small (maximum differences:  
209 <0.2 mV) and were most commonly observed when voltage was changing markedly between  
210 time steps (Fig. 5C, G).

211 As with other models (Fig. 3, 4), implementing NeuroGPU on faster GPUs decreased  
212 processing time (Fig. 5D, H). Interestingly, CUDA has been recently updated to allow for  
213 memory sharing across GPUs, which could be leveraged to decrease processing time further.  
214 To test this, we connected up to 4 Tesla V100 GPUs together and measured speedup on both  
215 BBP models displayed in Figure 5. As expected, adding more GPUs increased the overall  
216 processing capacity, and we noted shifts in the number of models that could be handled  
217 simultaneously before reaching maximum GPU utilization (Fig. 6). Furthermore, speedup was  
218 almost 2 orders of magnitude faster relative to NEURON.

## 219 **Profiling**

220 To better understand why NeuroGPU accelerated some models more than others, we used the  
221 NVIDIA profiler to monitor GPU utilization. Further, we tested two different memory handling  
222 configurations—SingleKernel and SplitKernel—to determine how best to utilize GPU parallel  
223 processing. In both cases, the GPU is responsible for updating ionic currents from given  
224 mechanisms, solving the tridiagonal matrix, and updating model states and voltages at each  
225 time step.

226 We found that configuring NeuroGPU in SingleKernel mode produced the fastest runtimes in all  
227 models tested (Table 1), and had higher GPU utilization levels. This indicates that, for most  
228 models, memory transfer between GPU and CPU is rate-limiting, and models run most  
229 efficiently when the majority of calculations are isolated on the GPU. Nevertheless, the highest  
230 utilization values were ~10% in the SingleKernel configuration (3.8% in SplitKernel), suggesting  
231 that additional memory optimizations could be leveraged in future iterations of NeuroGPU.

232

233

## 234 **Benefits of using NeuroGPU for parameter space exploration and genetic optimization**

235 Neuronal simulations are often tested over a range of parameter values to both explore the  
236 range of output generated and to optimize models to best fit empirical data (Druckmann et al.,  
237 2007; Van Geit et al., 2008; Keren et al., 2009; Gouwens et al., 2018). These simulations  
238 essentially run the same model repeatedly with small differences in underlying parameters,  
239 making them ideal for parallelization with NeuroGPU. Indeed, relative speedups would be  
240 identical to situations considered above (Fig. 3-6) and depend simply on the number of  
241 parameter sets used. Based on this, we developed a GUI that streamlines parameter space  
242 exploration in NeuroGPU.

243 To provide an example of parameter space exploration, we examined neuronal output in the  
244 BBP\_PC model when co-varying the density of the axonal fast inactivating sodium channel and  
245 axonal slow-inactivating potassium channel over a range of 0 to 10 and 0 to 20 S/cm<sup>2</sup>,  
246 respectively. Total spike output and select single traces are shown in Figure 7. As expected,  
247 increasing sodium conductance allowed models to generate more APs until sodium  
248 conductance was so high that models entered depolarization block. Similarly, reducing  
249 potassium conductance produced comparable results. Interestingly, certain combinations of  
250 sodium and potassium conductance concentrations produced bursting phenotypes  
251 characterized by high-frequency APs riding atop long-duration depolarizations. These  
252 presumably reflect parameter ranges that then interact with other ion channels in the model  
253 (e.g., Ca<sub>v</sub>3 channels) that promote such burst dynamics.

254 To implement genetic optimization within NeuroGPU, we integrated the DEAP (Distributed  
255 Evolutionary Algorithms in Python) package (Gagn, 2012). Genetic algorithm success lies in the  
256 balance between exploration of the whole parameter space and the exploitation of specific  
257 areas that seem promising. For this, large sample populations are ideal, as this allows for  
258 effective and broad parameter space exploration. NeuroGPU is more efficient when many  
259 instances are running in parallel, allowing for more effective application of genetic algorithms.

260 Genetic optimization was tested here by fitting model-generated voltages to a single voltage  
261 epoch containing APs that was generated by the default values present in the BBP\_PC model.  
262 We then determined how close different optimization sets could come to identifying these  
263 original parameter values. Optimization began with different population sizes comprised of 100  
264 to 10,000 individual parameter sets with random initial values (Fig. 8A). These populations were

265 run in four independent trials, each for 50 generations, and the difference between the naïve  
266 model and ground-truth model was compressed to a single score value (see Methods). For  
267 these scores, lower values indicate less difference between the two cases.

268 Scores improved for each of these populations, but the variance across trials and the overall  
269 score were markedly affected by the population size, with score decreasing in a near-linear  
270 fashion with each doubling of population size (Fig 8C). These score improvements were  
271 paralleled by a decrease in total processing time. For example, optimization with 10,000  
272 individual parameter sets ran 7.7x faster on NeuroGPU than NEURON (Fig. 8D; 10 vs 77 hours,  
273 respectively). While these are significant improvements in simulation speed, they are relatively  
274 modest compared to those observed in other conditions (Fig. 5), likely because current versions  
275 of NeuroGPU require NEURON to load the simulation and generate parameter values. This step  
276 is currently done using the CPU. Whether it is possible to parallelize this step will be explored in  
277 future versions of NeuroGPU.

278 **Discussion:**

279 In this work, we implemented a simulation environment to run single neuron compartmental  
280 models on GPUs. Based on our previous efforts (Ben-Shalom et al., 2013), we designed a user-  
281 friendly environment that enables one to port multi-compartmental models for implementation  
282 with CUDA. NeuroGPU was developed to be interoperable with NEURON (Cannon et al., 2007),  
283 thereby allowing anyone with expertise in the NEURON environment access to GPU-based  
284 acceleration. Towards this goal, we developed a platform to easily port NEURON models from  
285 either ModelDB or the BBP portal (Ramaswamy et al., 2015; McDougal et al., 2017) using a  
286 iPython notebook-based graphical user interface (GUI). We further developed GUIs for creating  
287 stimulation protocols, parameter exploration, and genetic optimization. By taking advantage of  
288 parallel processing inherent to GPUs, we were able to accelerate simulations dramatically, in  
289 some cases by almost two orders of magnitude.

290 NeuroGPU accelerates compartmental modeling largely through parallelization of matrix  
291 calculations. Solving the tridiagonal matrix is the most computationally demanding aspect of  
292 compartmental model simulations (Hines, 1984; Hines et al., 2008; Ben-Shalom et al., 2013).  
293 Therefore, we took advantage of fast, on-GPU memory and controlled the timing of calculations  
294 and memory transfers to optimize the use of computational resources (Volkov and Demmel,  
295 2008; Ben-Shalom et al., 2013; Nvidia, 2018). Resulting speedups depended primarily on  
296 neuronal morphology, and in general we found the NeuroGPU performed best when processing  
297 anatomically complex cases. Even in these cases, overall GPU utilization was limited by  
298 execution dependencies, where one aspect of GPU processing could not proceed until another  
299 aspect either transferred or processed its own memory. In the future, these dependencies may  
300 be further reduced through either dynamic parallelization (Zhang et al., 2015) or by increasing  
301 instruction level parallelism (ILP) (Volkov and Demmel, 2008). Nevertheless, the current version  
302 of NeuroGPU can still accelerate single neuron compartmental simulations by several orders of  
303 magnitude.

304 NeuroGPU addresses a major gap in currently implemented GPU-based simulation  
305 environments. In addition to NeuroGPU, two other neuronal simulations environments for multi-  
306 compartmental models have been implemented using GPUs, CoreNeuron (Hines et al., n.d.)  
307 and Arbor (Akar et al., 2019). Both of these environments are designed primarily to accelerate  
308 large scale network simulations. NeuroGPU, by contrast, is focused more on exploring the  
309 parameter space of single models and optimizing such models to best fit empirical data. As  
310 such, NeuroGPU has expanded GUIs for parameter exploration, which allows for quick

311 assessment of how changes in ion channel density across compartments affects neuronal  
312 excitability (Fig. 7). This approach may be particularly useful to generate testable hypotheses  
313 regarding channel distribution with pharmacological manipulations (Keren et al., 2009; Almog  
314 and Korngreen, 2014; Mäki-Marttunen et al., 2018), modulation of ion channels (Byczkovicz et  
315 al., n.d.), or in disease states where ion channel density is thought to be affected (Migliore and  
316 Migliore, 2012; Miceli et al., 2013; Ben-Shalom et al., 2017; Spratt et al., 2019). Furthermore,  
317 one could also generate a range of cells with variable channel densities and confirm that their  
318 activity is physiologically realistic (e.g., Fig. 7, all cases before generating depolarization block).  
319 These conditions could then be used as building blocks for variable activity within neuronal  
320 networks (Prinz et al., 2003, 2004; Alonso and Marder, 2019).

321 In addition to parameter exploration, NeuroGPU is designed for extensive model optimization  
322 using DEAP. Fitting computational models to empirical data is computationally taxing, and fits  
323 typically improve two-fold with each doubling of computational resources. Here, we found that  
324 NeuroGPU can accelerate DEAP processing times 8x (Fig. 8). Of note, these speedups  
325 compare single GPUs and CPUs. Leveraging multiple GPUs should accelerate this process  
326 further.

327 Future iterations of NeuroGPU may expand on the strengths and address limitations in using  
328 GPUs for compartmental modeling. Ion channels are modeled typically with Markov-based  
329 kinetics, or a simpler Markov approximation based on Hodgkin-Huxley type equations.  
330 NeuroGPU currently supports Hodgkin-Huxley-based mechanisms only, as we found that  
331 implementation of full Markov-based mechanisms on GPUs requires too much shared memory  
332 and reduces performance drastically (Ben-Shalom et al., 2012). As with total GPU utilization,  
333 improvements in memory handling may improve these cases. Furthermore, GPUs work best  
334 when the same instructions are occurring simultaneously on multiple memory addresses. This  
335 makes them ideal for iterating through models with identical morphologies and different channel  
336 distributions, but less ideal for network models containing a diversity of neuron types. As an  
337 intermediate, one could address this limitation by modeling networks containing discrete sets of  
338 neurons. For example, a network could contain several compartmental morphology models that  
339 each support multiple instances with different channel parameters, similar to the Ring model  
340 applied by Arbor (Akar et al., 2019; Kumbhar et al., 2019).

341 In its current state of development, NeuroGPU may help democratize compartmental modeling.  
342 While NeuroGPU can support simulations in large clusters using UNIX-based mutli-GPU  
343 architectures, it also is ideal for individual laboratories running simulations on Windows-based

344 workstations. Indeed, a workstation with total costs <\$3000, when kitted with appropriate GPUs,  
345 can out-perform large CPU-based clusters. This could help broaden the use and utility of  
346 computational modeling by bringing supercomputer-level processing power to a large range of  
347 academic settings.

348

349

350

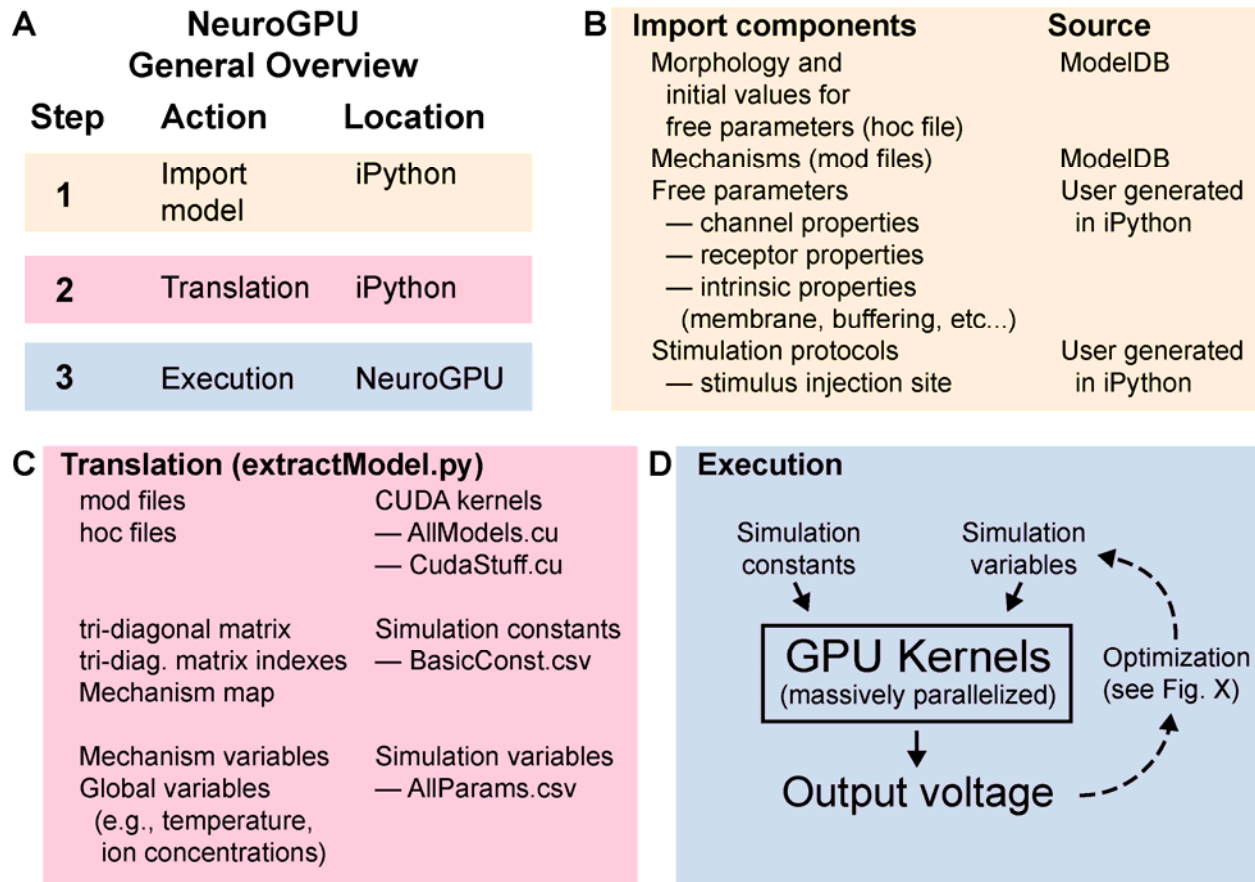

351

352 **Figure 1: NeuroGPU overview and flowchart**

353 **A:** Overview of the general workflow in NeuroGPU: The user ports a model via the iPython GUI  
 354 and customizes the simulation (panel B). NeuroGPU translates the model to CUDA code  
 355 that can run on the GPU and compiles executable code.

356 **B:** Sources for model components: The morphology and model's properties are described in  
 357 the hoc file. Additional mechanisms such as ion-channels are described in .mod files. The  
 358 stimulation protocols can be either imported or can be generated with our provided GUI

359 **C:** Import to NeuroGPU is done by the extractModel.py script. It translates mod files to GPU  
 360 kernels (see methods), which are written to AllModels.cu, and updates the course of the  
 361 simulation at CudaStuff.cu. extractModel.py writes to the BasicConst.csv the tri-diagonal  
 362 matrix and mechanism map, which indicates the mechanisms for each compartment. Finally,  
 363 extractModel.py writes all the mechanism parameters to AllParams.csv.

364 **D:** After extractModel.py terminates, it creates NeuroGPU.exe. When NeuroGPU is invoked it  
 365 reads the input files and runs the simulations for the different instances of the model and  
 366 writes their voltages output to a file. When NeuroGPU is used for optimization, new  
 367 instances of the models are created each iteration, and only AllParams.csv is updated via a  
 368 python script.

369

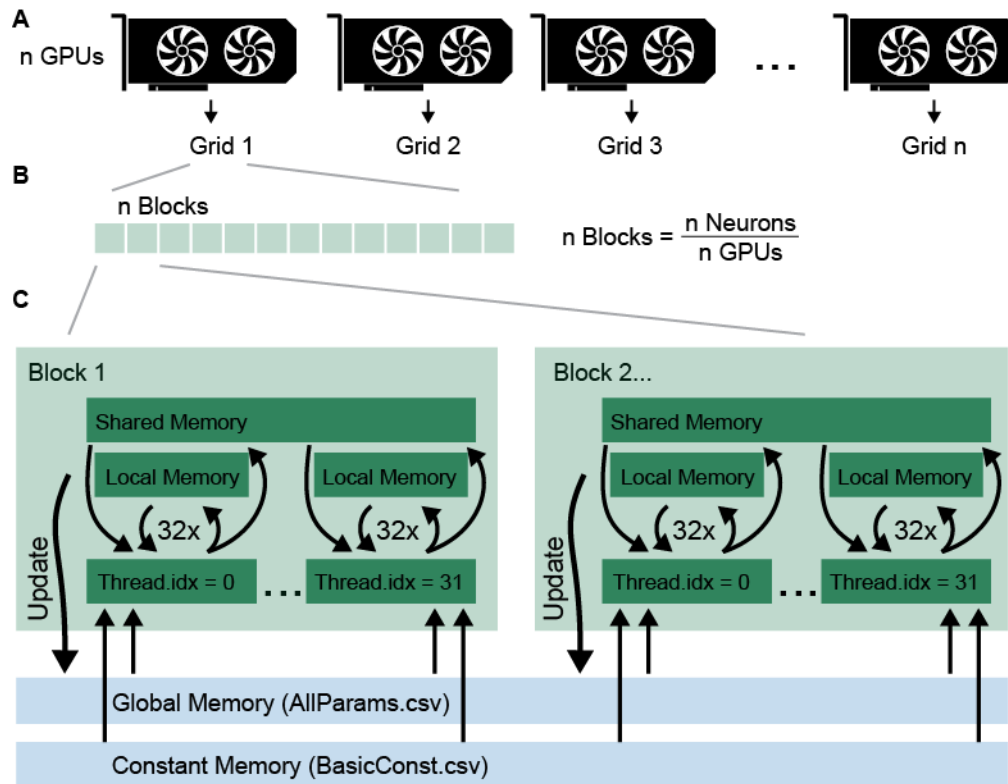

370

371

372 **Figure 2: NeuroGPU CUDA implementation**

373 **A:** NeuroGPU can be run on multiple GPUs; each GPU will run a separate grid of  
374 block/neurons (Nvidia, 2018).

375 **B:** Grids are distributed in blocks, with each block representing an instance of a model. The  
376 number of blocks in a grid is set by the number of model instances that will be simulated on  
377 an individual GPU.

378 **C:** A block is the basic simulation unit upon which 32 threads each update the memory in an  
379 ILP manner (see Methods). Global memory, which can be accessed by all blocks, stores  
380 mechanism parameters for every compartment. Constant memory, which is limited in size,  
381 stores the simulation constants such as the tri-diagonal matrix and the mechanism map.

382



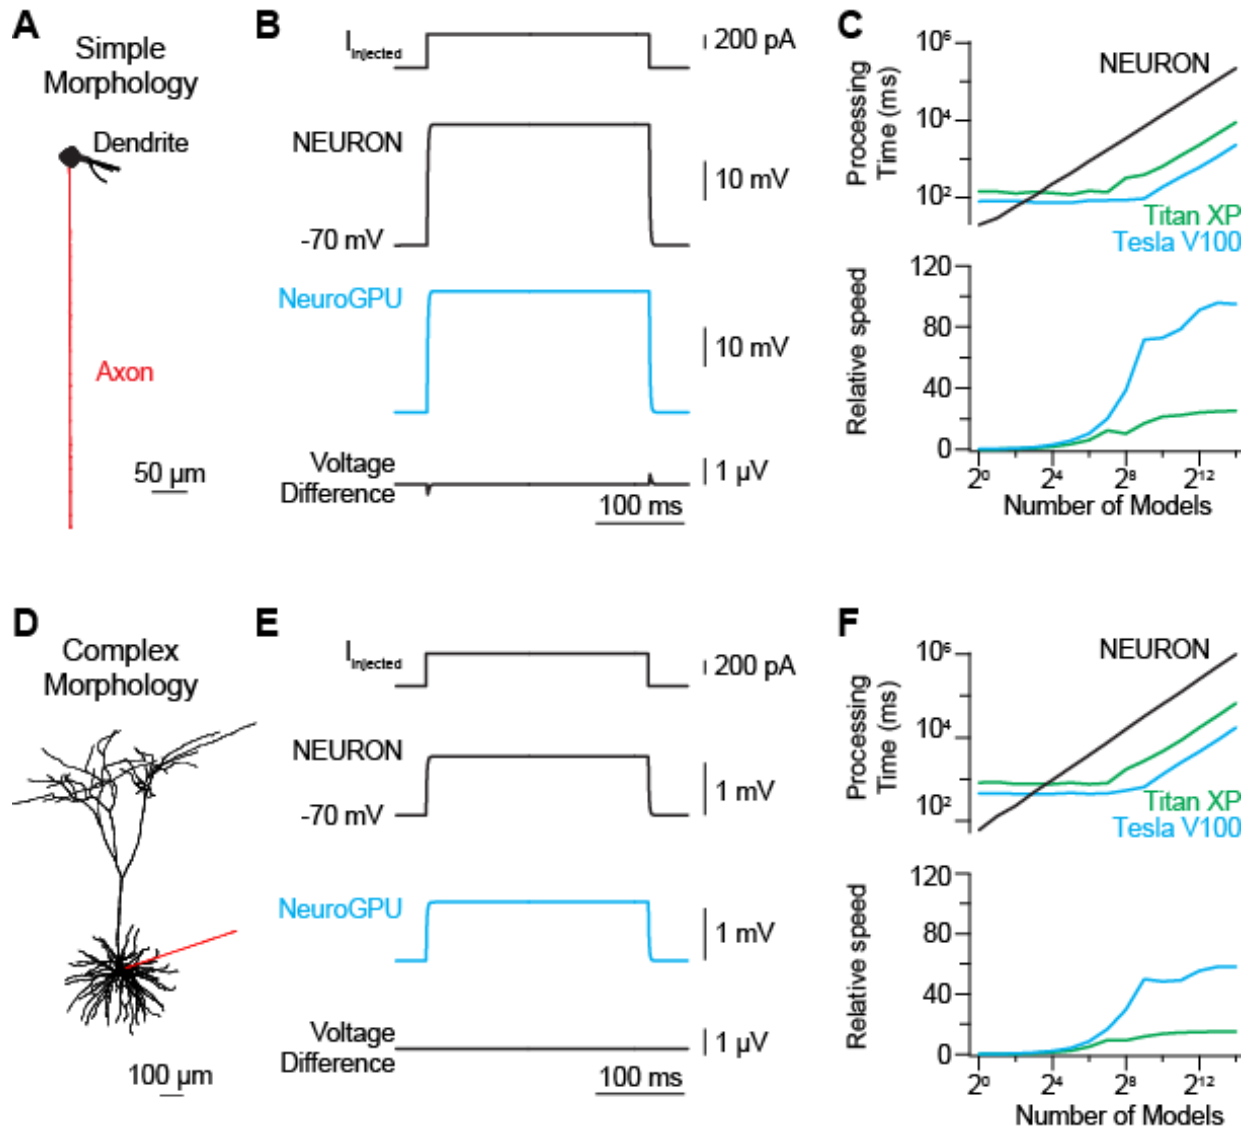

383

384 **Figure 3: *Passive model simulations***

385 **A:** Simple morphology with artificial axon. This model contains passive channels (pas.mod) in  
386 all compartments.

387 **B:** Top: injected current at the soma Middle: NEURON voltage response as recorded at the  
388 soma. Blue: NeuroGPU response as recorded at the soma. Bottom: difference in voltage  
389 between NEURON and NeuroGPU.

390 **C:** Top: Runtimes for the model using the different architectures: black – NEURON, green –  
391 NeuroGPU on TitanXP, blue – NeuroGPU on TeslaV100. X-axis in log2 scale, Y-axis in  
392 log10 scale. Bottom: Speedup compared to NEURON.

393 **D-F:** Same as A-C, but for complex morphology from (Mainen and Sejnowski, 1996).

394

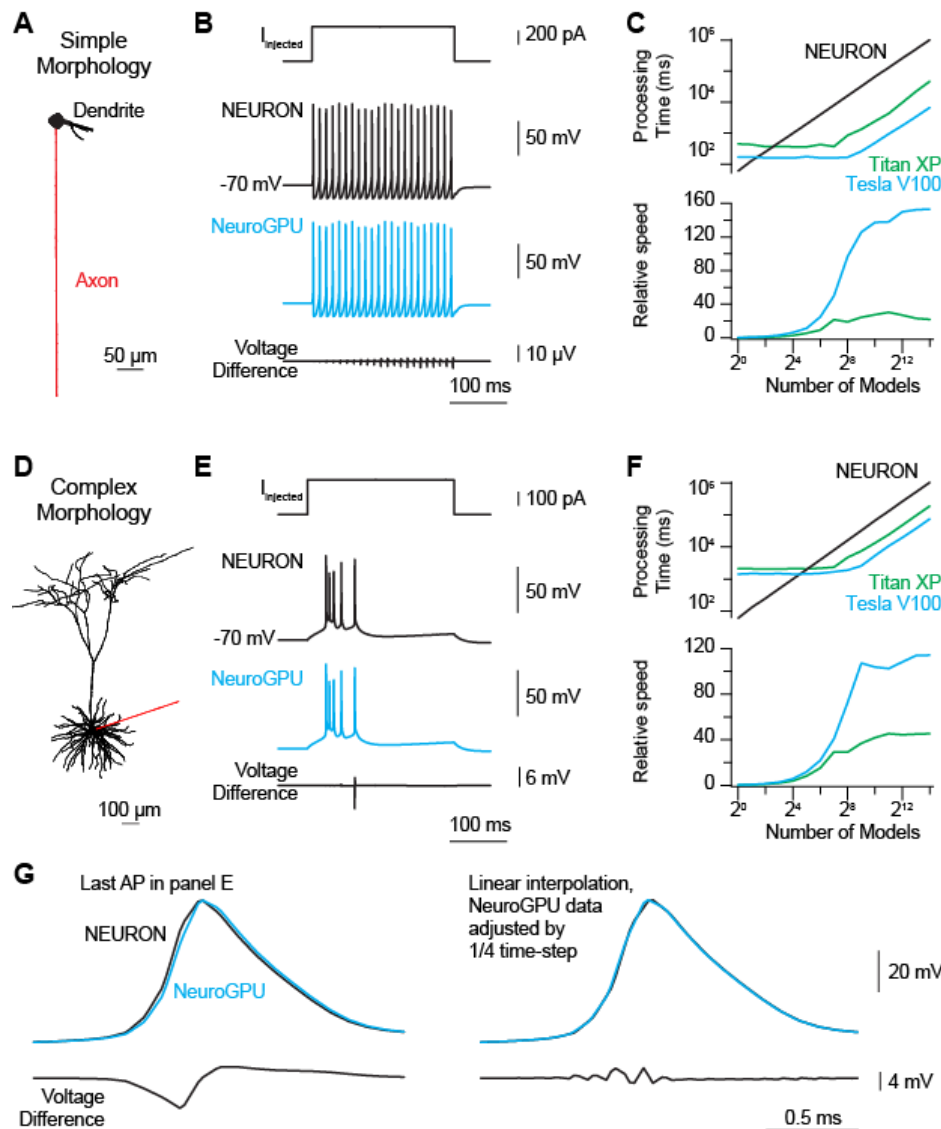

395

396 **Figure 4: Mainen and Sejnowski model neuron simulations**

397 **A:** Simple morphology with artificial axon and active and passive components distributed as in  
398 (Mainen and Sejnowski, 1996)

399 **B:** Top: injected current at the soma. Middle: NEURON voltage response as recorded at the  
400 soma. Cyan: NeuroGPU response as recorded at the soma. Bottom: difference in voltage  
401 between NEURON and NeuroGPU.

402 **C:** Top: Runtimes for the model using the different architectures: black – NEURON, green –  
403 NeuroGPU on TitanXP, blue – NeuroGPU on TeslaV100. X-axis in log<sub>2</sub> scale, Y-axis in  
404 log<sub>10</sub> scale. Bottom: Speedup compared to NEURON.

405 **D-F:** Same as A-C, but for neocortical layer 5 pyramidal cell morphology, as in (Mainen and  
406 Sejnowski, 1996).

407 **G:** Last AP in panel E, with expanded timebase, highlighting differences in voltage during the  
408 rising phase of the AP. Voltage differences are minimized by linearly interpolating the data  
409 4-fold and advancing NeuroGPU simulation by 1/4 time-step.

410

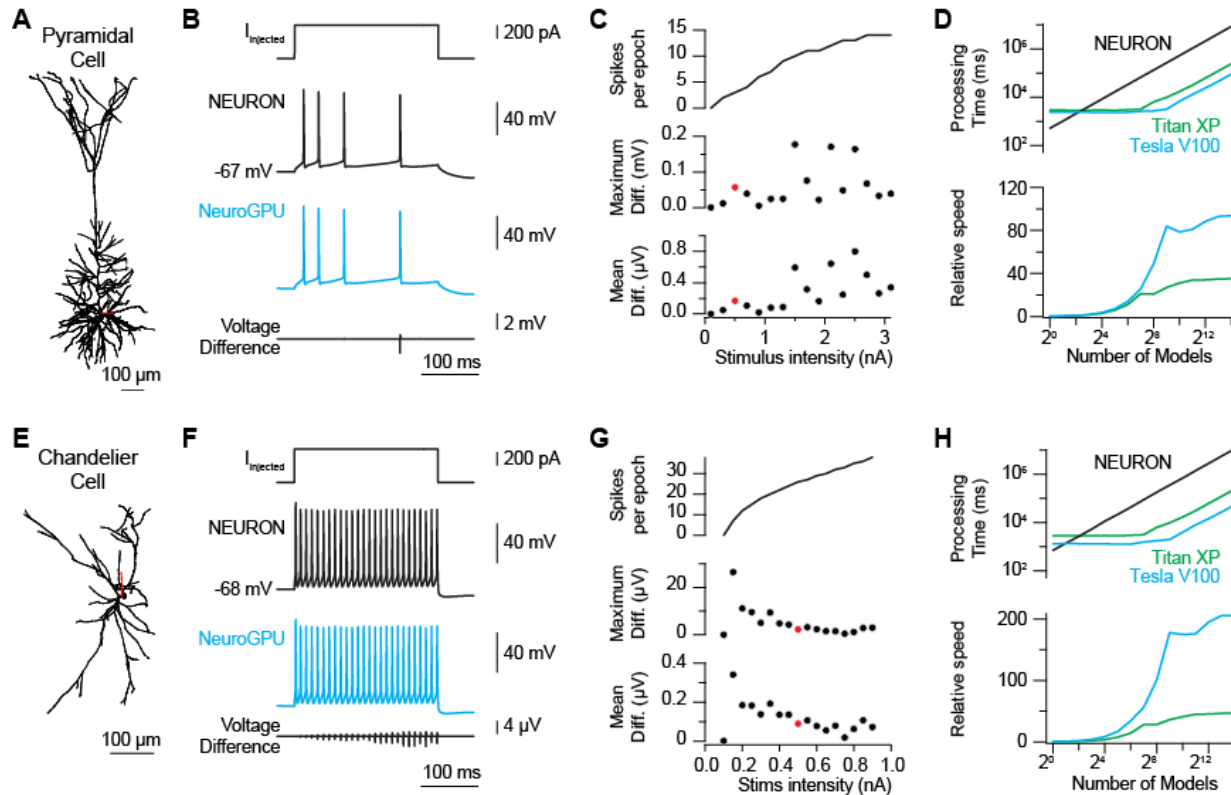

411

412 **Figure 5: BBP portal model simulations**

413 **A:** Morphology of a BBP portal layer 5 neocortical pyramidal cell (Ramaswamy et al., 2015).  
414 Dendrite in black, axon in red.

415 **B:** Top: injected current at the soma. Middle: NEURON voltage response as recorded at the  
416 soma. Cyan: NeuroGPU response as recorded at the soma. Bottom: difference in voltage  
417 between NEURON and NeuroGPU.

418 **C:** Top: APs generated per current injection intensity in the soma. Middle, bottom: Peak and  
419 average voltage difference between the voltage response in NEURON and NeuroGPU. Red  
420 circles denote examples in B.

421 **D:** Top: Runtimes for the model using the different architectures: black – NEURON, green –  
422 NeuroGPU on TitanXP, blue – NeuroGPU on TeslaV100. X-axis in log<sub>2</sub> scale, Y-axis in  
423 log<sub>10</sub> scale. Bottom: Speedup compared to NEURON.

424 **E-H:** Same as A-D, but for a model chandelier cell.

425

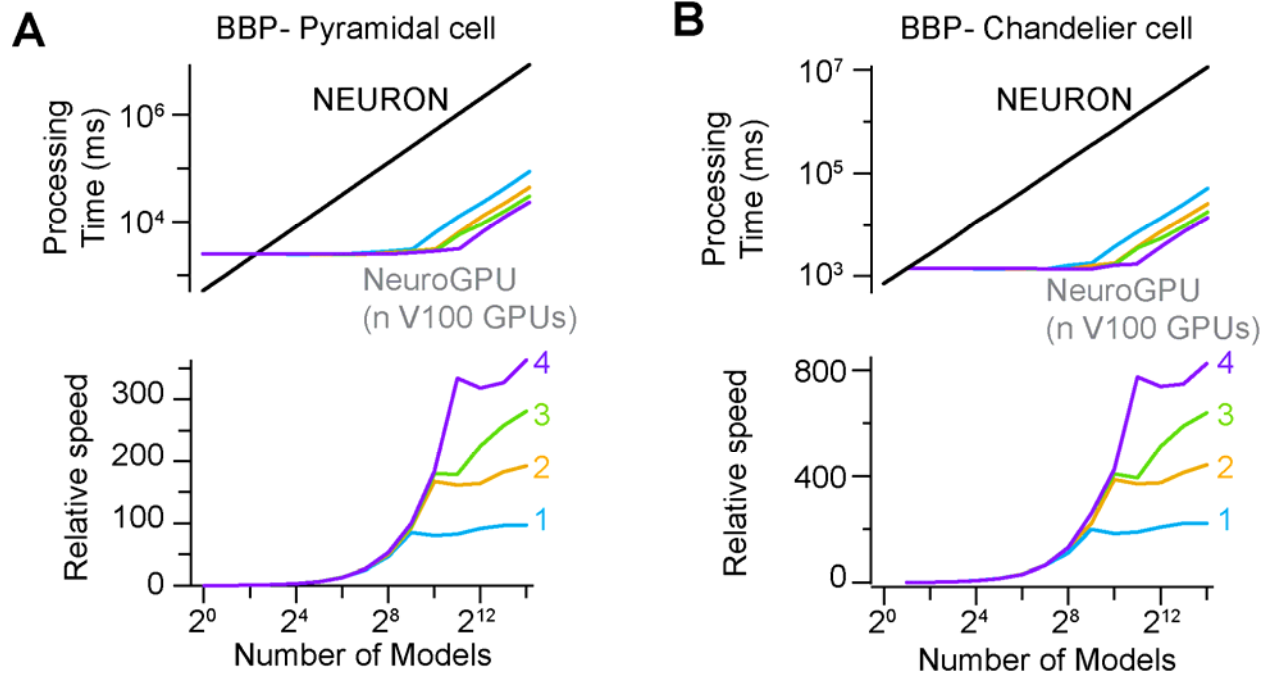

426

427 **Figure 6: NeuroGPU simulation on multiple GPUs**

428 **A:** Top: Runtimes for pyramidal cell model using a different numbers of V100 GPUs (cyan – 1  
429 orange – 2 green -3 purple – 4). X-axis is in log2 scale and Y-axis is in log10 scale. Bottom:  
430 Speedup compared to NEURON.

431 **B:** Same as A, but for chandelier cell model.

432

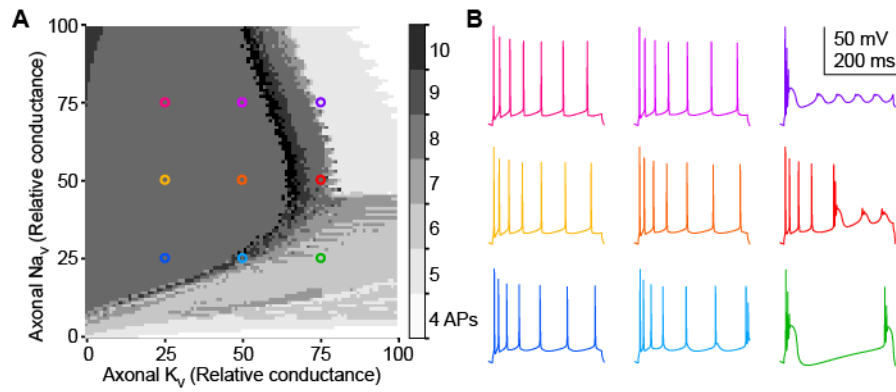

433

434 **Figure 7: Parameter space exploration in the BBP pyramidal model**

435 **A:** Each point in the grid represents the number of APs in the relevant model. Points on the  
436 axis represent the varied conductances of  $\text{Na}_v$  and  $\text{K}_v$  at the axon in the range of  $[0,10]$  and  
437  $[0,20]$   $\text{S}/\text{cm}^2$ , respectively.

438 **B:** Example voltage responses for chosen models from A. Colors matched to the  
439 corresponding model location in A.

440

441

442

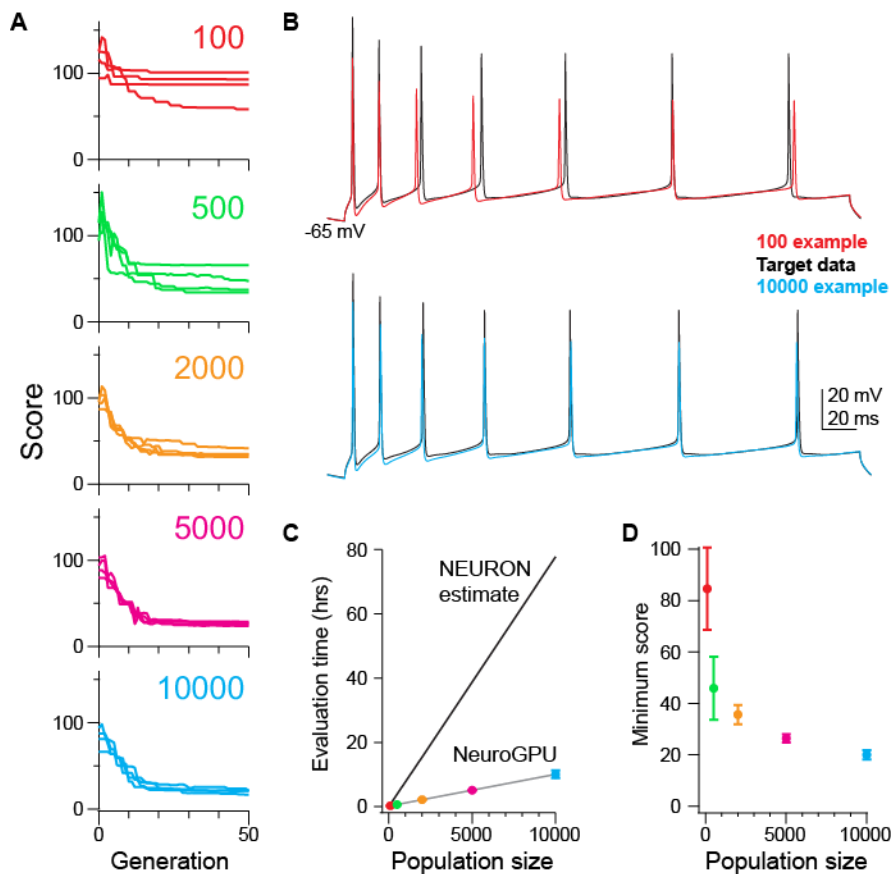

443

444 **Figure 8: Evolutionary optimization with NeuroGPU**

445 **A:** Optimizations examples using DEAP with different sizes of populations. Four Optimizations  
446 with different random starting population over 50 generations. Y axis is the error from the  
447 target voltage as described in the methods section. Lower values denote less error from  
448 target data.

449 **B:** Voltage traces obtained from optimization (worst case from population of 100: red; best case  
450 from population of 10,000: cyan) compared to ground truth (black).

451 **C:** Comparing runtimes for optimizations using NeuroGPU and NEURON (linearly extrapolated  
452 from 5 generations). Circles are color coded for population size as in A.

453 **D:** Best score in each optimization in A. Circles and error bars are mean  $\pm$  SEM.

454

455 **Table 1:**

| Model                                                                               | Morphology             | SingleKernel |             | SplitKernel  |             |
|-------------------------------------------------------------------------------------|------------------------|--------------|-------------|--------------|-------------|
|                                                                                     |                        | Acceleration | Utilization | Acceleration | Utilization |
| Passive membrane                                                                    | Soma & apical dendrite | 95.8         | 0.30%       | 78.8         | 0.41%       |
|                                                                                     | Pyramidal Cell         | 58.1         | 10%         | 55.2         | 3.62%       |
| Mainen and Sejnowski                                                                | Soma & apical dendrite | 153.1        | 10%         | 99.5         | 1%          |
|                                                                                     | Pyramidal Cell         | 114.2        | 10%         | 111.8        | 3.80%       |
| Blue Brain Project                                                                  | Pyramidal Cell         | 93           | 10%         | 107          | 3.70%       |
|                                                                                     | Chandelier Cell        | 205.6        | 10%         | 197.5        | 1.60%       |
| Acceleration: fold increase in processing speed relative to single core CPU (MODEL) |                        |              |             |              |             |
| Utilization: Percent of time the GPU is being used                                  |                        |              |             |              |             |

456

457

458 **Table 2:**

| Parameter Name      | Base value | Lower Bound | Upper Bound |
|---------------------|------------|-------------|-------------|
| gNaTa_tbar_NaTa_t   | 3.137968   | 0.3137968   | 31.37968    |
| gNaTs2_tbar_NaTs2_t | 0.983955   | 0.0983955   | 9.83955     |
| gK_Tstbar_K_Tst     | 0.089259   | 0.0089259   | 0.89259     |
| glhbar_lh           | 0.00008    | 0.000008    | 0.0008      |
| glmbar_lm           | 0.000143   | 0.0000143   | 0.00143     |
| gSKv3_1bar_SKv3_1   | 0.303472   | 0.0303472   | 3.03472     |

459

460 **Methods:**

461 **Hardware** — NEURON and TitanXP-based simulations were run on a PC with Intel Core I7-  
462 7700K 4.2GHz with 16GB of RAM. Tesla V100-based simulations were run using the NVIDIA  
463 PSG cluster. Here, each simulation was run on a single node with Haswell or Skylake CPU  
464 cores. For multi-GPU simulations, we used cluster nodes with NVLINK (Li et al., 2019) between  
465 the GPUs to enable memory peer-access.

466 **Software** — Simulations were performed in NEURON 7.6 and CUDA 9.1. All scripts were  
467 written in Python 3.7. All software is available at <https://github.com/roybens/NeuroGPU>.

468 **Importing NEURON models** — The python script `extractmodel.py` (Fig 1) exports NEURON  
469 models to NeuroGPU. This script reads all simulation details from `runModel.hoc`, which is  
470 populated using the GUI. NEURON models are described using either hoc or python scripts.  
471 The scripts include a morphology that can either be called as a separate file or constructed  
472 within the script.

473 **Translating mechanisms to CUDA** — Mechanisms in NEURON are described by NMODL  
474 (.mod) files (Hines and Carnevale, 2000), that update the mechanism states every simulation  
475 time step. This is done using three different procedures within NEURON that initialize  
476 mechanisms (`nrn_init`), update currents that mechanisms affect (`nrn_cur`), and then update  
477 mechanism states (`nrn_state`) (Carnevale and Hines, 2006). In NeuroGPU, CUDA kernels are  
478 written for each of these procedures using .mod and .c files that are generated by NEURON  
479 when running `nrnivmodl`. Kernels are saved and editable in `AllModels.cu` and `AllModels.h`.

480 **Extracting simulation properties from NEURON** — NeuroGPU utilizes NEURON for  
481 simulation pre-processing, including generating the mechanism map for mechanism distribution  
482 across compartments and exporting the tri-diagonal matrix using the `fmatrix()`. These are stored  
483 in `BasicConstSegP.csv`. NEURON extracts all parameters for cable equations and mechanism  
484 values within each compartment to `AllParams.csv`. External stimulation delivery location,  
485 intensity, and timecourse are written in `stim.csv`. Resting membrane potential and number of  
486 time steps in the simulation are written in `sim.csv`.

487 **Solving the tridiagonal matrix** — Matrix solutions were performed here using the branch-  
488 based parallelism approach as described in (Ben-Shalom et al., 2013), with morphology  
489 analysis guiding iterative matrix computations. This analysis is done in `extractmodel.py` and the  
490 data structures to solve the tri-diagonal in parallel is stored in `BasicConstSegP.csv`.



491 **Benchmarking** — All benchmarking was done compared to NEURON 7.6 running in a single  
492 thread. The morphology was adjusted to have one segment per compartment in both NEURON  
493 and NeuroGPU comparison. Simulation runtimes were compared without hard drive read/write  
494 file steps, as these aspects depend more on hard drive properties than CPU/GPU comparisons.

495 **Multi-compartmental models** — NeuroGPU performance was tested with 4 different models:  
496 1) A passive model, utilizing passive channels described in NEURON distribution pas.mod file.  
497 These channels were distributed on both simple and complex morphologies (see Fig. 3A, D)  
498 (Mainen and Sejnowski, 1996). The simple morphology was based on the simple morphology  
499 described in Mainen and Sejnowski, with compartments reduced to 32, as this is the minimum  
500 number of compartments required for NeuroGPU-based simulations.

501 2) The Mainen and Sejnowski (1996) model, with channels distributed on the same complex  
502 and simple morphologies (Fig 4). Channels are distributed as in (Mainen and Sejnowski, 1996)

503 3) A pyramidal cell model from the Blue Brain Project portal (Ramaswamy et al., 2015) (Fig 5).  
504 BBP\_PC refers to the model named L5\_TTPC1\_cADpyr232\_1.

505 4) A chandelier cell model, termed BBP\_CC, referring to L5\_ChC\_dNAC222\_1. For this model,  
506 the Kdshu2007.mod files were altered to run on NeuroGPU. Specifically, global variables were  
507 removed from the neuron block and instead placed in the assigned block (Carnevale and Hines,  
508 2006).

509 **Optimization algorithm** — The *eaMuPlusLambda* algorithm from the DEAP package was  
510 implemented by modifying the varOR procedure to call NeuroGPU (Rainville et al., 2012).  
511 Optimization was performed on the BBP\_PC model. For each iteration, the algorithm began with  
512 a new population of parameters with values randomly chosen with the range specified in Table  
513 2. The model was modified to accept new values from the optimization algorithm (similar  
514 changes were necessary to run the parameter space exploration for Figure 7). Target data were  
515 generated using the original parameters values described in Table 2. Optimization was targeted  
516 to reduce error between target data and test data using both the interspike interval (ISI) and the  
517 root mean square (RMS) of the voltage as the error function. Error was reduced to a single  
518 variable by weighting these two variables as:  $10 \cdot \text{ISI} + \text{RMS}$ .

519

520

521 **Acknowledgments**

522 We are grateful to Dr. Gilad Liberman who helped conceptualize this project. To the support and  
523 advice of NVIDIA developers – Dr. Jonathan Lefman, Dr. Jonathan Bentz, Dr. Xuemeng Zhang  
524 and Angela Chen in optimizing the CUDA code. To NVIDIA Corporation for donating the GPUs  
525 used in this study. To all the members of the Bender Lab for critically assessing this work. This  
526 research was supported by NIH Grants F32 NS095580 (RBS), MH112729 (KJB), and  
527 DA035913 (KJB).

528

529

530

531 **References**

- 532 Akar NA, Cumming B, Karakasis V, Küsters A, Klijn W, Peyser A, Yates S (2019) Arbor - A  
533 Morphologically-Detailed Neural Network Simulation Library for Contemporary High-  
534 Performance Computing Architectures. In: Proceedings - 27th Euromicro International  
535 Conference on Parallel, Distributed and Network-Based Processing, PDP 2019, pp 274–  
536 282.
- 537 Almog M, Korngreen A (2014) A quantitative description of dendritic conductances and its  
538 application to dendritic excitation in layer 5 pyramidal neurons. *J Neurosci* 34:182–196.
- 539 Alonso LM, Marder E (2019) Visualization of currents in neural models with similar behavior and  
540 different conductance densities. *Elife* 8.
- 541 Ben-Shalom R, Aviv A, Razon B, Korngreen A (2012) Optimizing ion channel models using a  
542 parallel genetic algorithm on graphical processors. *J Neurosci Methods* 206:183–194.
- 543 Ben-Shalom R, Keeshen CM, Berrios KN, An JY, Sanders SJ, Bender KJ (2017) Opposing  
544 Effects on NaV1.2 Function Underlie Differences Between SCN2A Variants Observed in  
545 Individuals With Autism Spectrum Disorder or Infantile Seizures. *Biol Psychiatry* 82:224–  
546 232.
- 547 Ben-Shalom R, Liberman G, Korngreen A (2013) Accelerating compartmental modeling on a  
548 graphical processing unit. *Front Neuroinform* 7:4.
- 549 Byczkowiec N, Eshra A, Montanaro J, Trevisiol A, Hirrlinger J, P Kole MH, Shigemoto R (n.d.)  
550 HCN channel-mediated neuromodulation can control action 1 potential velocity and fidelity  
551 in central axons.
- 552 Cannon RC, Gewaltig M-O, Gleeson P, Bhalla US, Cornelis H, Hines ML, Howell FW, Muller E,  
553 Stiles JR, Wils S, De Schutter E (2007) Interoperability of Neuroscience Modeling  
554 Software: Current Status and Future Directions. *Neuroinformatics* 5:127–138.
- 555 Carnevale NT, Hines ML (2006) *The NEURON Book*. Cambridge University Press.
- 556 Druckmann S, Banitt Y, Gidon A, Schürmann F, Markram H, Segev I (2007) A novel multiple  
557 objective optimization framework for constraining conductance-based neuron models by  
558 experimental data. *Front Neurosci* 1:7.
- 559 Einevoll GT, Destexhe A, Diesmann M, Grün S, Jirsa V, de Kamps M, Migliore M, Ness T V.,  
560 Plesser HE, Schürmann F (2019) The Scientific Case for Brain Simulations. *Neuron*  
561 102:735–744.
- 562 Eklund A, Dufort P, Forsberg D, LaConte SM (2013) Medical image processing on the GPU -  
563 past, present and future. *Med Image Anal* 17:1073–1094.
- 564 Fidjeland AK, Shanahan MP (2010) Accelerated Simulation of Spiking Neural Networks Using  
565 GPUs. *Ijcn'n* 10:1–8.
- 566 Gagn C (2012) DEAP: Evolutionary Algorithms Made Easy. *J Mach Learn Res* 13:2171–2175.
- 567 Go AW, Williamson MJ, Xu D, Poole D, Grand S Le, Walker RC, Götz AW, Williamson MJ, Xu  
568 D, Poole D, Le Grand S, Walker RC (2012) Routine microsecond molecular dynamics  
569 simulations with AMBER on GPUs. 1. generalized born. *J Chem Theory Comput* 8:1542–  
570 1555.
- 571 Gouwens NW, Berg J, Feng D, Sorensen SA, Zeng H, Hawrylycz MJ, Koch C, Arkhipov A

- 572 (2018) Systematic generation of biophysically detailed models for diverse cortical neuron  
573 types. *Nat Commun* 9.
- 574 Gurkiewicz M, Korngreen A (2007) A Numerical Approach to Ion Channel Modelling Using  
575 Whole-Cell Voltage-Clamp Recordings and a Genetic Algorithm. *PLoS Comput Biol*  
576 3:e169.
- 577 Hay E, Schurmann F, Markram H, Segev I, Schürmann F, Markram H, Segev I (2013)  
578 Preserving axosomatic spiking features despite diverse dendritic morphology. *J*  
579 *Neurophysiol* 109:2972–2981.
- 580 Hines M (1984) Efficient computation of branched nerve equations. *Int J Biomed Comput*  
581 15:69–76.
- 582 Hines ML, Carnevale NT (2000) Expanding NEURON's Repertoire of Mechanisms with  
583 NMODL. *Neural Comput* 12:995–1007.
- 584 Hines ML, Eichner H, Schürmann F (2008) Neuron splitting in compute-bound parallel network  
585 simulations enables runtime scaling with twice as many processors. *J Comput Neurosci*  
586 25:203–210.
- 587 Hines P, Fouriaux M, Jan NC (n.d.) An Optimized Compute Engine for the NEURON Simulator.
- 588 Keren N, Bar-Yehuda D, Korngreen A (2009) Experimentally guided modelling of dendritic  
589 excitability in rat neocortical pyramidal neurones. *J Physiol* 587:1413–1437.
- 590 Kumbhar P, Hines M, Fouriaux J, Ovcharenko A, King J, Delalondre F, Schürmann F (2019)  
591 CoreNEURON: An Optimized Compute Engine for the NEURON Simulator.
- 592 Li A, Song SL, Chen J, Li J, Liu X, Tallent N, Barker K (2019) Evaluating Modern GPU  
593 Interconnect: PCIe, NVLink, NV-SLI, NVSwitch and GPUDirect.
- 594 Mainen ZF, Sejnowski TJ (1996) Influence of dendritic structure on firing pattern in model  
595 neocortical neurons. *Nature* 382:363–366.
- 596 Mäki-Marttunen T, Haines G, Devor A, Metzner C, Dale AM, Andreassen OA, Einevoll GT  
597 (2018) A stepwise neuron model fitting procedure designed for recordings with high spatial  
598 resolution: Application to layer 5 pyramidal cells. *J Neurosci Methods* 293:264–283.
- 599 Markram H et al. (2015) Reconstruction and Simulation of Neocortical Microcircuitry. *Cell*  
600 163:456–492.
- 601 McDougal RA, Morse TM, Carnevale T, Marengo L, Wang R, Migliore M, Miller PL, Shepherd  
602 GM, Hines ML (2017) Twenty years of ModelDB and beyond: building essential modeling  
603 tools for the future of neuroscience. *J Comput Neurosci* 42:1–10.
- 604 Miceli F, Soldovieri MV, Ambrosino P, Barrese V, Migliore M, Cilio MR, Tagliatela M (2013)  
605 Genotype–phenotype correlations in neonatal epilepsies caused by mutations in the  
606 voltage sensor of  $K_v 7.2$  potassium channel subunits. *Proc Natl Acad Sci* 110:4386–4391.
- 607 Migliore M, Migliore R (2012) Know Your Current Ih: Interaction with a Shunting Current  
608 Explains the Puzzling Effects of Its Pharmacological or Pathological Modulations Attali B,  
609 ed. *PLoS One* 7:e36867.
- 610 Nocedal J, Wright S (2006) Numerical optimization.
- 611 Nvidia C (2018) Cuda c programming guide, version 9.1. NVIDIA Corp.

- 612 Pachitariu M, Steinmetz N, Kadir S, Carandini M, D. HK (2016) Kilosort: realtime spike-sorting  
613 for extracellular electrophysiology with hundreds of channels. bioRxiv:061481.
- 614 Payne JL, Sinnott-Armstrong NA, Moore JH (2010) Exploiting Graphics Processing Units for  
615 Computational Biology and Bioinformatics. *Interdiscip Sci* 2:213–220.
- 616 Prein AF, Langhans W, Fosser G, Ferrone A, Ban N, Goergen K, Keller M, Tölle M, Gutjahr O,  
617 Feser F, Brisson E, Kollet S, Schmidli J, Van Lipzig NPM, Leung R (2015) A review on  
618 regional convection-permitting climate modeling: Demonstrations, prospects, and  
619 challenges. *Rev Geophys* 53:323–361.
- 620 Prinz AA, Billimoria CP, Marder E (2003) Alternative to Hand-Tuning Conductance-Based  
621 Models: Construction and Analysis of Databases of Model Neurons. *J Neurophysiol*  
622 90:3998–4015.
- 623 Prinz AA, Bucher D, Marder E (2004) Similar network activity from disparate circuit parameters.  
624 *Nat Neurosci* 7:1345–1352.
- 625 Rainville F De, Fortin F, Gardner M, Parizeau M, Gagné C (2012) DEAP: A Python Framework  
626 for Evolutionary Algorithms. *Companion proc Genet Evol Comput Conf*:85–92.
- 627 Ramaswamy S et al. (2015) The neocortical microcircuit collaboration portal: a resource for rat  
628 somatosensory cortex. *Front Neural Circuits* 9:44.
- 629 Salomon-Ferrer R, Götz AW, Poole D, Le Grand S, Walker RC, Go AW, Poole D, Grand S Le,  
630 Walker RC (2013) Routine microsecond molecular dynamics simulations with AMBER on  
631 GPUs. 2. Explicit solvent particle mesh ewald. *J Chem Theory Comput* 9:3878–3888.
- 632 Schmidhuber J (2015) Deep Learning in neural networks: An overview. *Neural Networks* 61:85–  
633 117.
- 634 Spratt PWE, Ben-Shalom R, Keeshen CM, Burke KJ, Clarkson RL, Sanders SJ, Bender KJ  
635 (2019) The Autism-Associated Gene Scn2a Contributes to Dendritic Excitability and  
636 Synaptic Function in the Prefrontal Cortex. *Neuron*. epub ahead of print
- 637 Van Geit W, De Schutter E, Achard P (2008) Automated neuron model optimization techniques:  
638 a review. *Biol Cybern* 99:241–251.
- 639 Volkov V, Demmel JW (2008) Benchmarking GPUs to tune dense linear algebra. In: 2008 SC -  
640 International Conference for High Performance Computing, Networking, Storage and  
641 Analysis, pp 1–11. IEEE.
- 642 Whitehead N (2011) Precision & Performance: Floating Point and IEEE 754 Compliance  
643 for NVIDIA GPUs.
- 644 Zhang P, Holk E, Matty J, Misurda S, Zalewski M, Chu J, McMillan S, Lumsdaine A (2015)  
645 Dynamic parallelism for simple and efficient GPU graph algorithms. In: *Proceedings of the*  
646 *5th Workshop on Irregular Applications Architectures and Algorithms - IA3 '15*, pp 1–4.  
647 New York, New York, USA: ACM Press.
- 648
- 649
- 650
- 651
